# Supplementary material for: Effects of Environmental Factors on the Nonstructural Carbohydrates in Larix principis-rupprechtii
Source: MDPI journal article supplement (doi:10.3390/f14020345), 2023-02-09
Supplement: s1 [file s1]

# Effects of Environmental Factors on the Nonstructural Carbohydrates in *Larix principis-rupprechtii*

## Supplementary material

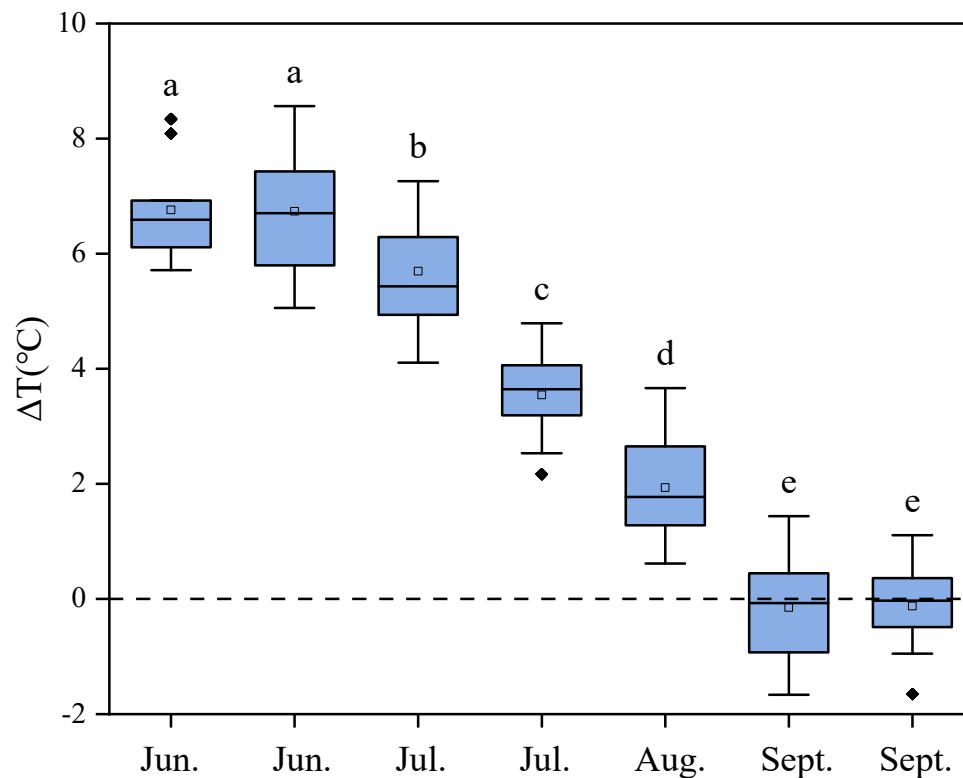

**Figure S1.** Temperature gradients ( $\Delta T = T_a - T_s$ ) for  $T_s$  (soil temperature) to  $T_a$  (air temperature) during the growing season. According to the results of Tukey's multiple range test, the boxes with the same lowercase letters are not significantly different at the 0.05 level.

**Table S1.** Model fitted for the NSC and its components in different organs vs. environmental factors.

|        |                     | Needle          |              | Shoot           |              | Stem            |              | Root            |              | Overall         |              |
|--------|---------------------|-----------------|--------------|-----------------|--------------|-----------------|--------------|-----------------|--------------|-----------------|--------------|
|        |                     | <i>Estimate</i> | <i>p</i>     |
| Sugar  | $\alpha$            | 7.077           | <b>0.006</b> | 4.864           | <b>0.033</b> | 4.004           | <b>0.000</b> | 7.465           | <b>0.000</b> | 4.951           | 0.103        |
|        | $\beta_{Ta}$        | -0.512          | <b>0.000</b> | 0.213           | 0.118        | 0.065           | 0.160        | -0.034          | 0.692        | -0.017          | 0.783        |
|        | $\beta_{Ts}$        | 0.922           | <b>0.000</b> | 0.711           | <b>0.000</b> | 0.015           | 0.827        | 0.115           | 0.368        | 0.486           | <b>0.000</b> |
|        | $\beta_{VPD}$       | 9.669           | <b>0.006</b> | 2.143           | 0.517        | -2.147          | 0.060        | 0.999           | 0.637        | 3.471           | <b>0.026</b> |
|        | $\beta_{SWC}$       | -0.070          | 0.989        | -3.091          | 0.499        | -5.90           | <b>0.002</b> | -3.366          | 0.212        | -3.583          | 0.146        |
|        | $\delta_{Altitude}$ | 1.214           |              | 0.706           |              | 0.163           |              | 0.138           |              | 0.451           |              |
|        | $\delta_{Organ}$    |                 |              |                 |              |                 |              |                 |              | 19.23           |              |
|        | $\varepsilon$       | 13.403          |              | 23.37           |              | 1.403           |              | 7.849           |              | 4.045           |              |
|        | $R^2m$              | 0.1083          |              | 0.172           |              | 0.169           |              | 0.012           |              | 0.034           |              |
|        | $R^2c$              | 0.1824          |              | 0.196           |              | 0.256           |              | 0.029           |              | 0.598           |              |
| Starch | $\alpha$            | 13.548          | <b>0.000</b> | 11.42373        | <b>0.000</b> | 15.561          | <b>0.000</b> | 20.05           | <b>0.000</b> | 14.693          | <b>0.000</b> |
|        | $\beta_{Ta}$        | -0.220          | 0.111        | -0.73755        | <b>0.000</b> | -0.304          | <b>0.016</b> | -1.145          | <b>0.000</b> | -0.684          | <b>0.000</b> |
|        | $\beta_{Ts}$        | 0.575           | <b>0.006</b> | 1.12381         | <b>0.010</b> | 0.278           | 0.138        | 0.682           | <b>0.000</b> | 0.842           | <b>0.000</b> |
|        | $\beta_{VPD}$       | 10.835          | <b>0.002</b> | 8.28946         | <b>0.000</b> | 1.323           | 0.664        | 3.404           | 0.229        | 7.846           | <b>0.000</b> |
|        | $\beta_{SWC}$       | -25.36          | <b>0.000</b> | -5.46481        | 0.102        | -4.897          | 0.307        | -2.404          | 0.395        | -10.834         | <b>0.000</b> |
|        | $\delta_{Altitude}$ | 4.136           |              | 0.859           |              | 1.26            |              | 0.000           |              | 0.922           |              |
|        | $\delta_{Organ}$    |                 |              |                 |              |                 |              |                 |              | 2.482           |              |
|        | $\varepsilon$       | 11.969          |              | 8.683           |              | 10.10           |              | 16.92           |              | 13.70           |              |
|        | $R^2m$              | 0.268           |              | 0.254           |              | 0.052           |              | 0.283           |              | 0.132           |              |
|        | $R^2c$              | 0.456           |              | 0.321           |              | 0.157           |              | 0.283           |              | 0.305           |              |
| NSC    | $\alpha$            | 19.271          | <b>0.000</b> | 16.032          | <b>0.000</b> | 18.641          | <b>0.000</b> | 27.693          | <b>0.000</b> | 19.440          | <b>0.000</b> |
|        | $\beta_{Ta}$        | -0.713          | <b>0.000</b> | -0.5386         | <b>0.005</b> | -0.230          | 0.118        | -1.191          | <b>0.000</b> | -0.706          | <b>0.000</b> |
|        | $\beta_{Ts}$        | 1.4771          | <b>0.000</b> | 1.872           | <b>0.000</b> | 0.295           | 0.180        | 0.825           | <b>0.003</b> | 1.344           | <b>0.000</b> |
|        | $\beta_{VPD}$       | 20.805          | <b>0.000</b> | 11.077          | <b>0.018</b> | -0.428          | 0.904        | 4.778           | 0.271        | 11.616          | <b>0.000</b> |
|        | $\beta_{SWC}$       | -21.92          | <b>0.011</b> | -8.652          | 0.232        | -8.728          | 0.138        | -6.784          | 0.214        | -14.235         | <b>0.000</b> |
|        | $\delta_{Altitude}$ | 8.017           |              | 3.288           |              | 2.726           |              | 0.439           |              | 2.58            |              |
|        | $\delta_{Organ}$    |                 |              |                 |              |                 |              |                 |              | 12.94           |              |
|        | $\varepsilon$       | 28.00           |              | 44.41           |              | 13.479          |              | 33.51           |              | 35.85           |              |
|        | $R^2m$              | 0.179           |              | 0.188           |              | 0.055           |              | 0.171           |              | 0.089           |              |
|        | $R^2c$              | 0.362           |              | 0.244           |              | 0.214           |              | 0.182           |              | 0.364           |              |
| SSR    | $\alpha$            | 0.579           | 0.164        | 0.471           | <b>0.007</b> | 0.314           | <b>0.000</b> | 0.199           | 0.260        | 0.299           | 0.329        |
|        | $\beta_{Ta}$        | -0.056          | <b>0.022</b> | 0.080           | <b>0.000</b> | 0.010           | <b>0.001</b> | 0.034           | <b>0.003</b> | 0.029           | <b>0.000</b> |
|        | $\beta_{Ts}$        | 0.082           | <b>0.025</b> | -0.041          | <b>0.008</b> | -0.007          | 0.095        | 0.002           | 0.905        | -0.002          | 0.846        |
|        | $\beta_{VPD}$       | 0.275           | 0.645        | -0.497          | 0.053        | -0.277          | <b>0.000</b> | 0.226           | 0.429        | -0.098          | 0.582        |
|        | $\beta_{SWC}$       | 1.891           | <b>0.046</b> | 0.384           | 0.241        | -0.362          | <b>0.024</b> | -0.097          | 0.777        | 0.581           | <b>0.041</b> |
|        | $\delta_{Altitude}$ | 0.036           |              | 0.002           |              | 0.00002         |              | 0.001           |              | 0.004           |              |
|        | $\delta_{Organ}$    |                 |              |                 |              |                 |              |                 |              | 0.241           |              |
|        | $\varepsilon$       | 0.396           |              | 0.148           |              | 0.007           |              | 0.146           |              | 0.186           |              |
|        | $R^2m$              | 0.125           |              | 0.206           |              | 0.181           |              | 0.072           |              | 0.022           |              |
|        | $R^2c$              | 0.199           |              | 0.216           |              | 0.184           |              | 0.083           |              | 0.578           |              |

SSR: soluble sugar–starch ratios; Significant parameters are in bold. Following the equation,  $\alpha$  is the intercept of the fixed effect;  $\beta_{Ta}$ ,  $\beta_{Ts}$ ,  $\beta_{VPD}$ , and  $\beta_{SWC}$  are coefficients of air temperature ( $T_a$ , °C), soil temperature ( $T_s$ , °C), vapor pressure deficit (VPD, kPa), and soil water content (SWC,  $m^3/m^3$ ) in the model, respectively;  $\delta_{Altitude}$  and  $\delta_{Organ}$  are the standard deviation for the altitude and organ random effect, respectively; and  $\varepsilon$  is the final residual.  $R^2m$ : caused by fixed effects  $R^2$ .  $R^2c$ : caused by both fixed effects and random effects  $R^2$ .

**Table S2.** Model fitted for the NSC and its components in different organs vs.  $\Delta T$ ( $\Delta T = T_a - T_s$ ).

|        |                            | Needle          |              | Shoot           |              | Stem            |              | Root            |              | Overall         |              |
|--------|----------------------------|-----------------|--------------|-----------------|--------------|-----------------|--------------|-----------------|--------------|-----------------|--------------|
|        |                            | <i>Estimate</i> | <i>p</i>     |
| Sugar  | $\alpha$                   | 11.895          | <b>0.000</b> | 11.698          | <b>0.000</b> | 2.164           | <b>0.002</b> | 7.112           | <b>0.000</b> | 8.123           | <b>0.033</b> |
|        | $\beta_{\Delta T}$         | -0.293          | <b>0.001</b> | 0.061           | 0.503        | 0.012           | 0.680        | -0.018          | 0.731        | -0.031          | 0.439        |
|        | $\delta_{\text{Altitude}}$ | 0.921           |              | 0.461           |              | 0.538           |              | 0.106           |              | 0.423           |              |
|        | $\delta_{\text{Organ}}$    |                 |              |                 |              |                 |              |                 |              | 19.257          |              |
|        | $\varepsilon$              | 14.038          |              | 27.621          |              | 1.501           |              | 7.846           |              | 14.88           |              |
|        | R <sup>2</sup> m           | 0.048           |              | 0.001           |              | 0.0006          |              | 0.0004          |              | 0.0002          |              |
|        | R <sup>2</sup> c           | 0.106           |              | 0.017           |              | 0.264           |              | 0.014           |              | 0.570           |              |
| Starch | $\alpha$                   | 8.720           | <b>0.000</b> | 13.839          | <b>0.000</b> | 13.719          | <b>0.000</b> | 15.435          | <b>0.000</b> | 13.166          | <b>0.000</b> |
|        | $\beta_{\Delta T}$         | 0.242           | <b>0.006</b> | -0.511          | <b>0.000</b> | -0.209          | <b>0.006</b> | -0.768          | <b>0.000</b> | -0.376          | <b>0.000</b> |
|        | $\delta_{\text{Altitude}}$ | 5.727           |              | 0.677           |              | 2.002           |              | 0.077           |              | 1.073           |              |
|        | $\delta_{\text{Organ}}$    |                 |              |                 |              |                 |              |                 |              | 2.477           |              |
|        | $\varepsilon$              | 13.555          |              | 9.282           |              | 9.944           |              | 18.576          |              | 14.179          |              |
|        | R <sup>2</sup> m           | 0.026           |              | 0.254           |              | 0.030           |              | 0.205           |              | 0.063           |              |
|        | R <sup>2</sup> c           | 0.315           |              | 0.321           |              | 0.193           |              | 0.208           |              | 0.251           |              |
| NSC    | $\alpha$                   | 20.60           | <b>0.000</b> | 25.544          | <b>0.000</b> | 15.873          | <b>0.000</b> | 22.553          | <b>0.000</b> | 21.288          | <b>0.000</b> |
|        | $\beta_{\Delta T}$         | -0.048          | 0.719        | -0.452          | <b>0.000</b> | -0.194          | <b>0.028</b> | -0.789          | <b>0.000</b> | -0.406          | <b>0.000</b> |
|        | $\delta_{\text{Altitude}}$ | 9.74            |              | 2.089           |              | 4.748           |              | 0.225           |              | 2.43            |              |
|        | $\delta_{\text{Organ}}$    |                 |              |                 |              |                 |              |                 |              | 12.96           |              |
|        | $\varepsilon$              | 31.10           |              | 51.531          |              | 13.267          |              | 35.028          |              | 37.33           |              |
|        | R <sup>2</sup> m           | 0.0005          |              | 0.032           |              | 0.018           |              | 0.126           |              | 0.026           |              |
|        | R <sup>2</sup> c           | 0.239           |              | 0.069           |              | 0.277           |              | 0.131           |              | 0.310           |              |
| SSR    | $\alpha$                   | 1.529           | <b>0.000</b> | 0.860           | <b>0.000</b> | 0.163           | <b>0.000</b> | 0.525           | <b>0.000</b> | 0.735           | 0.057        |
|        | $\beta_{\Delta T}$         | -0.067          | <b>0.000</b> | 0.050           | <b>0.000</b> | 0.00025         | <b>0.001</b> | 0.025           | <b>0.001</b> | 0.013           | <b>0.005</b> |
|        | $\delta_{\text{Altitude}}$ | 0.0332          |              | 0.003           |              | 0.0010          |              | 0.002           |              | 0.0035          |              |
|        | $\delta_{\text{Organ}}$    |                 |              |                 |              |                 |              |                 |              | 0.242           |              |
|        | $\varepsilon$              | 0.404           |              | 0.163           |              | 0.0078          |              | 0.150           |              | 0.192           |              |
|        | R <sup>2</sup> m           | 0.082           |              | 0.115           |              | 0.006           |              | 0.033           |              | 0.003           |              |
|        | R <sup>2</sup> c           | 0.152           |              | 0.131           |              | 0.114           |              | 0.043           |              | 0.562           |              |

SSR: soluble sugar–starch ratios; Significant parameters are in bold. Following the equation,  $\alpha$  is the intercept of the fixed effect;  $\beta_{\Delta T}$  is the coefficient of  $\Delta T$  [air temperature ( $T_a$ , °C) minus soil temperature ( $T_s$ , °C)] in the model;  $\delta_{\text{Altitude}}$  and  $\delta_{\text{Organ}}$  are the standard deviation for the altitude and organ random effect, respectively; and  $\varepsilon$  is the final residual. R<sup>2</sup>m: caused by fixed effects R<sup>2</sup>. R<sup>2</sup>c: caused by both fixed effects and random effects R<sup>2</sup>.
